# Supplementary material for: Analysis of the effects of air pollutants and meteorological factors on upper respiratory tract infection outpatients in Gansu Province
Source: Royal Society of Chemistry journal article supplement (doi:10.1039/d4em00748d), 2025-01-01
Supplement: d4em00748d1.pdf [file d4em00748d1.pdf]

## Supplemental Materials

### Details and formulas in 2.3. Study Methods

#### The single-pollutant model:

$$\text{Log}(\mu_t) = \alpha + \beta X_{t,l} + ns(Temp_t, df) + ns(RH_t, df) + ns(Time_t, df) + Dow + Holiday$$

where  $\alpha$  is the intercept,  $\mu_t$  denotes outpatient visits to the URTI on day  $t$ ,  $X_{t,l}$

indicates the cross-basis matrix of each pollutant adopted by applying the DLNM,  $\beta$  is

the regression coefficient for  $X_{t,l}$ ,  $ns$  is the natural cubic spline function,  $df$  represents

the degree of freedom.  $Temp_t$  is daily temperature on day  $t$ ,  $RH_t$  is daily RH on day  $t$ ,

$Time_t$  is a time variable that controls long-term trends and seasonality.  $Dow$  and  $Holiday$

are categorical variables reflect days of the week and holiday effects, respectively.

Based on previous literature studies, we used Quasi-Poisson Akaike Information

Criterion (Q-AIC) minimization principle to determine the  $df$  for related confounding

factors.<sup>38</sup> In this study, we specified 3  $df$  for both temperature and RH, and set a  $df$  of

7/year for the time variable  $Time_t$ .<sup>11,39-40</sup>

#### The DLNM model of ambient temperature is shown below:

$$\text{Log}(\mu_t) = \alpha + \beta Temp_{t,l} + ns(Pollutant_t, df) + ns(RH_t, df) + ns(Time_t, df) + Dow + Holiday$$

Where  $Temp_{t,l}$  refers to the DLNM cross basis matrix of ambient temperature, we

selected a natural cubic spline for the space of temperature with two internal knots at

equally spaced temperature percentiles and another natural cubic spline with two

internal knots at equally spaced  $\log_{10}$ -values of lags (plus intercept).  $Pollutant_t$  is the

daily concentration of  $PM_{10}$ ,  $SO_2$ ,  $NO_2$  on day  $t$ , other variables are defined with the

previous formula. The Q-AIC was used to assess the model fit and ensure the optimal

$df$  for different variables, we specified 3  $df$  for both  $Pollutant_t$  and  $RH_t$ , and set a  $df$  of

7/year for the time variable  $Time_t$ .<sup>20</sup>

#### The model fitting the impact of RH on outpatient visits for URTI is as follows:

$$\text{Log}(\mu_t) = \alpha + \beta RH_{t,l} + ns(Pollutant_t, df) + ns(Temp_t, df) + ns(Time_t, df) + Dow + Holiday$$

Where  $RH_{t,l}$  is cross basis matrix produced by DLNM to model the RH, we selected a natural cubic spline for the space of RH with two internal knots at equally spaced RH percentiles and another natural cubic spline with two internal knots at equally spaced  $\log_{10}$ -values of lags (plus intercept).  $Pollutant_t$  is the concentration value of each air pollutant on  $t$ , other variables are defined with the previous formula. Similarly, the  $df$  for related variables were chosen based on the Q-AIC, we specified 3  $df$  for both  $Pollutant_t$  and  $Temp_t$ , and set a  $df$  of 7/year for the time variable  $Time_t$ .<sup>42</sup>

The formula for the interaction effect model between air pollutants and temperature is shown below:

$$\text{Log}(\mu_t) = \alpha + Te(AP_{t,l}, Temp_t) + ns(RH_t, df) + ns(Time_t, df) + Dow + Holiday$$

The formula for the interaction effect model between air pollutants and RH is provided below:

$$\text{Log}(\mu_t) = \alpha + Te(AP_{t,l}, RH_t) + ns(Temp_t, df) + ns(Time_t, df) + Dow + Holiday$$

In the above two formulas,  $Te()$  is the tensor product smooth function,  $AP_{t,l}$  is the  $l$ -day moving average of air pollutants on day  $t$ , and other variables are defined with the previous formula. Based on the Q-AIC minimization principle, the  $df$  of  $Temp_t$  and  $RH_t$  is set to 3, and the  $df$  of  $Time_t$  is set to 7/year.

The following shows the formula for the temperature stratification model:

$$\text{Log}(\mu_t) = \alpha + \beta_1 Pollutant + \beta_2 Temp_k + \beta_3 (Pollutant_t \cdot Temp_k) + ns(RH_t, df) + ns(Time_t, df) + Dow + Holiday$$

The following shows the formula for the RH stratification model:

$$\text{Log}(\mu_t) = \alpha + \beta_1 Pollutant + \beta_2 RH_k + \beta_3 (Pollutant_t \cdot RH_k) + ns(Temp_t, df) + ns(Time_t, df) + Dow + Holiday$$

$Temp_t$  is the daily mean temperature level on  $t$ ,  $RH_t$  is the RH level on  $t$ , which are

51 categorical variables.  $\beta_1$ ,  $\beta_2$ , and  $\beta_3$  reflect the main effect of air pollutants, the main  
52 effect of temperature or RH, and the effect of the interaction term between air pollutants  
53 and the daily mean temperature or RH, respectively. And other variables are defined  
54 with the previous formula. Based on the Q-AIC minimization principle, the *df* of  $Temp_t$   
55 and  $RH_t$  is set to 3, and the *df* of  $Time$  is set to 7/year.

56 We tested for differences in effect estimates between categories of potential effect  
57 modifiers by calculating the 95% confidence interval. as shown below,

$$58 \quad Z = \frac{\hat{Q}_1 - \hat{Q}_2}{\sqrt{SE_1 + SE_2}}$$

59 where  $Z$  is the  $z$  score,  $Q_1$  and  $Q_2$  are the effect estimates in the two subgroups;  
60 and  $SE_1$  and  $SE_2$  are their respective standard errors.<sup>26</sup>

61 BKMR is a machine learning approach that can be used to best simulate the mixed  
62 effects of exposure mixtures by using kernel functions. In this study, we performed a  
63 hierarchical variable selection method with 10,000 iterations via the Markov chain  
64 Monte Carlo algorithm. Comprehensive descriptions of the model are available in prior  
65 literature.<sup>47,48</sup>

66

67

68 **Table S1** Basic profile of URTI outpatient visits in the three municipalities during the  
69 study period.

| City     | Variable                  | Mean±SD | Min | $P_{25}$ | $P_{50}$ | $P_{75}$ | Max |
|----------|---------------------------|---------|-----|----------|----------|----------|-----|
| Jiuquan  | Outpatient Visits of URTI | 105±60  | 0   | 61       | 105      | 146      | 315 |
|          | Male                      | 56±37   | 0   | 38       | 58       | 135      | 206 |
|          | Female                    | 49±22   | 0   | 23       | 46       | 101      | 114 |
|          | 0-14 years                | 43±27   | 0   | 23       | 47       | 73       | 124 |
|          | 15-64 years               | 27±16   | 0   | 15       | 25       | 42       | 99  |
|          | ≥65 years                 | 35±13   | 0   | 21       | 32       | 53       | 136 |
| Dingxi   | Outpatient Visits of URTI | 99±53   | 0   | 58       | 96       | 136      | 298 |
|          | Male                      | 59±33   | 0   | 36       | 57       | 71       | 187 |
|          | Female                    | 40±22   | 0   | 20       | 38       | 66       | 117 |
|          | 0-14 years                | 49±29   | 0   | 29       | 47       | 67       | 161 |
|          | 15-64 years               | 26±14   | 0   | 12       | 24       | 34       | 78  |
|          | ≥65 years                 | 24±16   | 0   | 15       | 25       | 35       | 60  |
| Tianshui | Outpatient Visits of URTI | 70±59   | 0   | 32       | 68       | 115      | 441 |
|          | Male                      | 44±24   | 0   | 25       | 42       | 76       | 296 |
|          | Female                    | 26±18   | 0   | 8        | 21       | 50       | 145 |
|          | 0-14 years                | 37±32   | 0   | 19       | 38       | 64       | 180 |
|          | 15-64 years               | 14±8    | 0   | 6        | 11       | 23       | 106 |
|          | ≥65 years                 | 19±11   | 0   | 7        | 18       | 31       | 126 |

70

71

72 **Table S2** Basic daily air pollutants and meteorological factors in three cities during the  
73 study period.

| Variable                               | City     | Mean±SD      | Min    | $P_{25}$ | $P_{50}$ | $P_{75}$ | Max     | $F$    | $P$    |
|----------------------------------------|----------|--------------|--------|----------|----------|----------|---------|--------|--------|
| PM <sub>2.5</sub> (μg/m <sup>3</sup> ) | Jiuquan  | 31.00±26.00  | 7.00   | 17.00    | 24.00    | 36.00    | 325.00  | 1.051  | 0.350  |
|                                        | Dingxi   | 33.97±22.61  | 6.00   | 18.00    | 27.00    | 45.00    | 243.00  |        |        |
|                                        | Tianshui | 33.51±22.91  | 4.00   | 18.00    | 26.00    | 46.00    | 224.00  |        |        |
| PM <sub>10</sub> (μg/m <sup>3</sup> )  | Jiuquan  | 113.00±43.00 | 11.00  | 54.00    | 78.00    | 116.00   | 1727.00 | 27.427 | < 0.05 |
|                                        | Dingxi   | 77.82±59.83  | 8.00   | 40.00    | 60.00    | 94.00    | 1059.00 |        |        |
|                                        | Tianshui | 69.22±51.08  | 8.00   | 36.00    | 58.00    | 90.00    | 761.00  |        |        |
| SO <sub>2</sub> (μg/m <sup>3</sup> )   | Jiuquan  | 12.00±6.00   | 2.00   | 8.00     | 10.00    | 14.00    | 36.00   | 3.235  | < 0.05 |
|                                        | Dingxi   | 16.36±11.81  | 2.00   | 5.00     | 8.00     | 23.00    | 86.00   |        |        |
|                                        | Tianshui | 15.20±13.07  | 5.00   | 8.00     | 10.00    | 16.00    | 95.00   |        |        |
| NO <sub>2</sub> (μg/m <sup>3</sup> )   | Jiuquan  | 24.00±9.00   | 4.00   | 17.00    | 23.00    | 30.00    | 64.00   | 15.679 | < 0.05 |
|                                        | Dingxi   | 26.43±10.17  | 4.00   | 18.00    | 26.00    | 34.00    | 59.00   |        |        |
|                                        | Tianshui | 31.53±13.75  | 2.00   | 21.00    | 28.00    | 40.00    | 83.00   |        |        |
| O <sub>3</sub> 8h (μg/m <sup>3</sup> ) | Jiuquan  | 93.00±26.00  | 32.00  | 73.00    | 95.00    | 112.00   | 168.00  | 1.567  | 0.213  |
|                                        | Dingxi   | 93.33±27.95  | 7.00   | 72.00    | 91.00    | 114.00   | 173.00  |        |        |
|                                        | Tianshui | 86.72±33.60  | 6.00   | 63.00    | 87.00    | 110.00   | 261.00  |        |        |
| CO (mg/m <sup>3</sup> )                | Jiuquan  | 0.57±0.23    | 0.18   | 0.40     | 0.50     | 0.70     | 1.80    | 5.678  | < 0.05 |
|                                        | Dingxi   | 0.63±0.40    | 0.10   | 0.40     | 0.50     | 0.80     | 2.40    |        |        |
|                                        | Tianshui | 0.70±0.44    | 0.20   | 0.40     | 0.60     | 0.90     | 3.30    |        |        |
| Mean temperature (°C)                  | Jiuquan  | 8.80±5.70    | -21.00 | -1.10    | 10.00    | 19.30    | 29.50   | 10.235 | < 0.05 |
|                                        | Dingxi   | 7.82±4.36    | -13.60 | -0.50    | 9.05     | 16.20    | 26.10   |        |        |
|                                        | Tianshui | 11.93±8.90   | -8.90  | 3.90     | 12.80    | 19.61    | 29.10   |        |        |
| Relative humidity (%)                  | Jiuquan  | 44.88±15.80  | 13.00  | 33.00    | 43.00    | 55.00    | 99.00   | 35.679 | < 0.05 |
|                                        | Dingxi   | 63.14±16.55  | 18.33  | 50.54    | 64.00    | 76.00    | 100.00  |        |        |
|                                        | Tianshui | 65.63±13.30  | 17.42  | 57.00    | 67.00    | 75.00    | 95.00   |        |        |

74

75

76

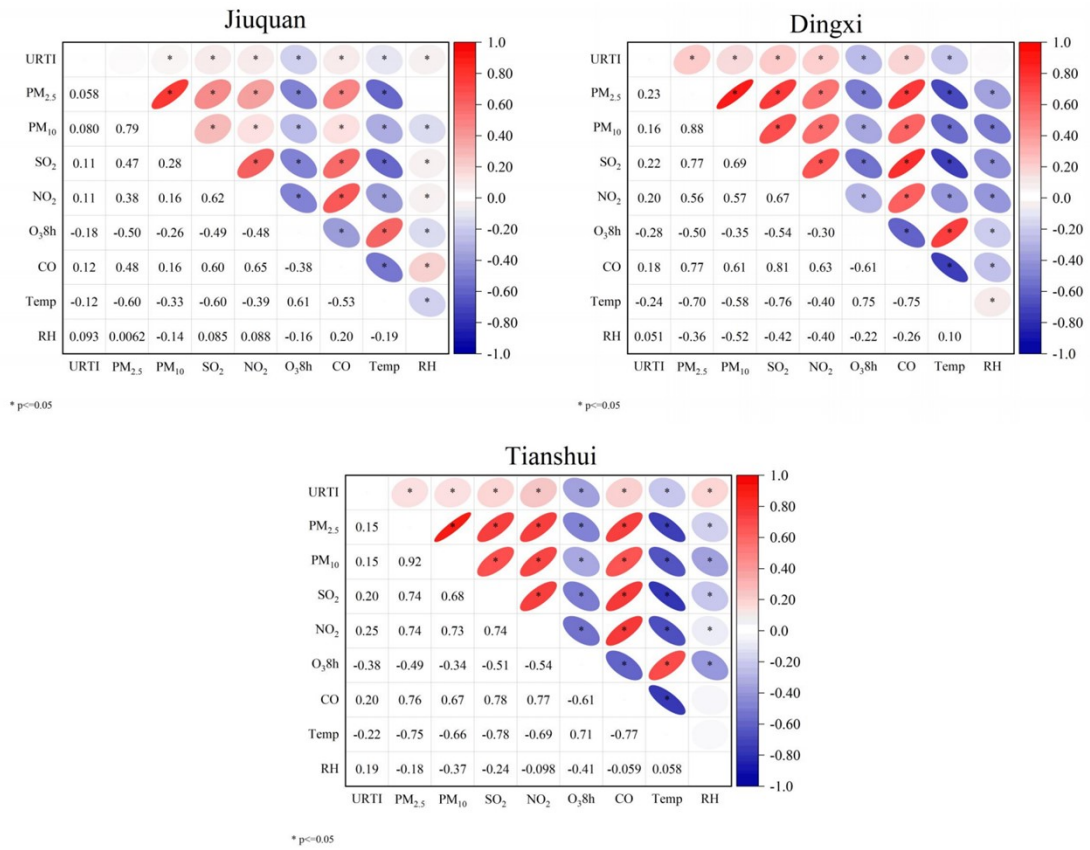

77  
 78 **Figure S1** Spearman's correlation analysis of URTI outpatient visits, air pollutants and  
 79 meteorological factors in three cities of Gansu Province.

81 **Table S3** Relative risk and 95% CI of outpatient visits for URTI associated with a 10  
82  $\mu\text{g}/\text{m}^3$  increase in pollutants concentrations (each  $1\text{mg}/\text{m}^3$  increase in CO  
83 concentration)<sup>a</sup> by gender, age and season in three cities analyzed.

|                 | PM <sub>2.5</sub>  | PM <sub>10</sub>   | NO <sub>2</sub>    | CO                 |
|-----------------|--------------------|--------------------|--------------------|--------------------|
| <b>Jiuquan</b>  |                    |                    |                    |                    |
| Gender          |                    |                    |                    |                    |
| Male            | 1.134(1.055,1.219) | 1.056(1.025,1.076) | 1.129(1.030,1.238) | 2.502(1.876,2.911) |
| Female          | 1.122(1.020,1.233) | 1.044(1.025,1.063) | 0.941(0.839,1.056) | 1.844(0.712,4.775) |
| Age(years)      |                    |                    |                    |                    |
| 0-14            | 1.142(1.094,1.191) | 1.035(1.024,1.046) | 1.171(1.005,1.366) | 3.336(2.190,5.081) |
| 15-64           | 0.851(0.760,0.953) | 0.972(0.936,1.010) | 0.745(0.667,0.833) | 0.829(0.681,1.213) |
| ≥65             | 1.008(0.903,1.127) | 1.013(0.986,1.041) | 1.093(1.036,1.152) | 1.501(0.844,2.143) |
| Season          |                    |                    |                    |                    |
| Cold            | 1.126(1.001,1.267) | 1.093(1.056,1.130) | 1.694(1.331,2.155) | 2.307(1.521,3.126) |
| Warm            | 0.936(0.821,1.066) | 0.993(0.963,1.024) | 1.052(0.945,1.170) | 1.455(0.743,2.850) |
| <b>Dingxi</b>   |                    |                    |                    |                    |
| Gender          |                    |                    |                    |                    |
| Male            | 1.132(1.076,1.191) | 1.014(0.999,1.030) | 1.072(1.006,1.142) | 2.650(1.852,3.792) |
| Female          | 1.113(1.064,1.164) | 1.010(0.992,1.028) | 1.046(0.988,1.107) | 2.214(1.597,3.070) |
| Age(years)      |                    |                    |                    |                    |
| 0-14            | 1.156(1.021,1.308) | 1.042(1.001,1.085) | 1.153(1.063,1.288) | 3.039(1.306,5.067) |
| 15-64           | 1.109(1.056,1.164) | 1.012(0.996,1.028) | 1.021(0.965,1.081) | 2.102(1.474,2.997) |
| ≥65             | 1.131(1.080,1.184) | 1.013(0.996,1.030) | 1.053(0.989,1.120) | 2.546(1.834,3.533) |
| Season          |                    |                    |                    |                    |
| Cold            | 1.193(1.117,1.273) | 1.029(0.991,1.068) | 1.245(1.154,1.344) | 2.396(1.664,3.451) |
| Warm            | 0.994(0.922,1.072) | 1.017(0.994,1.042) | 1.030(0.918,1.155) | 1.543(0.689,3.453) |
| <b>Tianshui</b> |                    |                    |                    |                    |
| Gender          |                    |                    |                    |                    |
| Male            | 1.028(0.988,1.069) | 1.017(0.999,1.034) | 1.163(1.109,1.221) | 1.912(1.522,2.402) |
| Female          | 0.948(0.897,1.003) | 1.011(0.984,1.038) | 1.144(1.075,1.218) | 1.470(1.079,2.004) |
| Age(years)      |                    |                    |                    |                    |
| 0-14            | 1.092(0.991,1.203) | 1.065(1.019,1.113) | 1.197(1.137,1.260) | 2.574(2.012,3.292) |
| 15-64           | 0.991(0.936,1.049) | 1.002(0.983,1.022) | 0.945(0.846,1.056) | 0.861(0.758,0.933) |
| ≥65             | 1.012(0.969,1.056) | 1.027(1.000,1.054) | 1.110(1.039,1.185) | 1.644(1.202,2.250) |
| Season          |                    |                    |                    |                    |
| Cold            | 1.042(0.986,1.101) | 1.032(1.001,1.064) | 1.276(1.193,1.364) | 2.115(1.318,2.805) |
| Warm            | 0.917(0.859,0.980) | 0.993(0.964,1.022) | 1.146(0.990,1.326) | 1.455(1.028,2.060) |

84 <sup>a</sup> Concentration of PM<sub>2.5</sub> at lag014, PM<sub>10</sub> at lag014, NO<sub>2</sub> at lag011, and CO at lag014 were  
85 analyzed.

86

**Table S4** Associations of each 10 µg/m<sup>3</sup> increase in pollutants (each 1mg/m<sup>3</sup> increase in CO concentration) <sup>a</sup> with relative risk of outpatient visits for URTI using single and two pollutant models in three cities.

| Pollutants and Models  | PM <sub>2.5</sub>  | PM <sub>10</sub>   | NO <sub>2</sub>    | CO                  |
|------------------------|--------------------|--------------------|--------------------|---------------------|
| <b>Jiuquan</b>         |                    |                    |                    |                     |
| Single-pollutant model | 1.134(1.057,1.218) | 1.045(1.026,1.064) | 1.118(1.022,1.224) | 5.433(2.818,10.475) |
| + PM <sub>2.5</sub>    | -                  | -                  | 1.112(1.043,1.151) | 5.399(2.859,10.460) |
| + PM <sub>10</sub>     | -                  | -                  | 1.124(1.081,1.237) | 5.408(2.818,10.160) |
| + SO <sub>2</sub>      | 1.115(1.037,1.200) | 1.045(1.023,1.064) | 1.096(1.008,1.189) | 5.417(2.881,10.969) |
| + NO <sub>2</sub>      | 1.122(1.037,1.214) | 1.042(1.023,1.061) | -                  | 5.411(2.818,10.448) |
| + O <sub>3</sub> 8h    | 1.144(1.065,1.229) | 1.051(1.032,1.071) | 1.117(1.016,1.228) | 5.448(2.848,11.609) |
| + CO                   | 1.159(1.071,1.254) | 1.035(1.016,1.054) | 0.914(0.794,1.052) | -                   |
| <b>Dingxi</b>          |                    |                    |                    |                     |
| Single-pollutant model | 1.118(1.069,1.168) | 1.014(0.999,1.029) | 1.050(0.993,1.111) | 2.289(1.659,3.156)  |
| + PM <sub>2.5</sub>    | -                  | -                  | 1.040(0.982,1.102) | 2.088(1.499,2.909)  |
| + PM <sub>10</sub>     | -                  | -                  | 1.059(0.993,1.131) | 2.483(1.730,3.563)  |
| + SO <sub>2</sub>      | 1.099(1.056,1.151) | 1.016(0.993,1.032) | 1.060(0.993,1.031) | 1.921(1.366,2.842)  |
| + NO <sub>2</sub>      | 1.110(1.056,1.167) | 1.010(0.993,1.027) | -                  | 2.262(1.730,3.074)  |
| + O <sub>3</sub> 8h    | 1.142(1.092,1.194) | 1.013(0.997,1.028) | 1.043(0.966,1.093) | 1.980(1.348,2.923)  |
| + CO                   | 1.107(1.058,1.159) | 1.019(0.994,1.034) | 1.060(0.995,1.120) | -                   |
| <b>Tianshui</b>        |                    |                    |                    |                     |
| Single-pollutant model | 1.012(0.972,1.053) | 1.016(0.998,1.035) | 1.158(1.104,1.215) | 1.836(1.453,2.295)  |
| + PM <sub>2.5</sub>    | -                  | -                  | 1.179(1.115,1.246) | 1.831(1.434,2.338)  |
| + PM <sub>10</sub>     | -                  | -                  | 1.170(1.103,1.242) | 1.809(1.393,2.349)  |
| + SO <sub>2</sub>      | 1.015(0.914,1.059) | 1.012(0.973,1.031) | 1.129(1.103,1.192) | 2.061(1.599,2.658)  |
| + NO <sub>2</sub>      | 1.059(0.914,1.007) | 1.093(0.973,1.015) | -                  | 1.894(1.393,2.218)  |
| + O <sub>3</sub> 8h    | 1.009(0.969,1.050) | 1.016(0.998,1.035) | 1.163(1.102,1.226) | 1.778(1.407,2.246)  |
| + CO                   | 1.000(0.959,1.043) | 1.013(0.996,1.032) | 1.110(1.053,1.171) | -                   |

<sup>a</sup> Concentration of PM<sub>2.5</sub> at lag014, PM<sub>10</sub> at lag014, NO<sub>2</sub> at lag011, and CO at lag014 were analyzed.



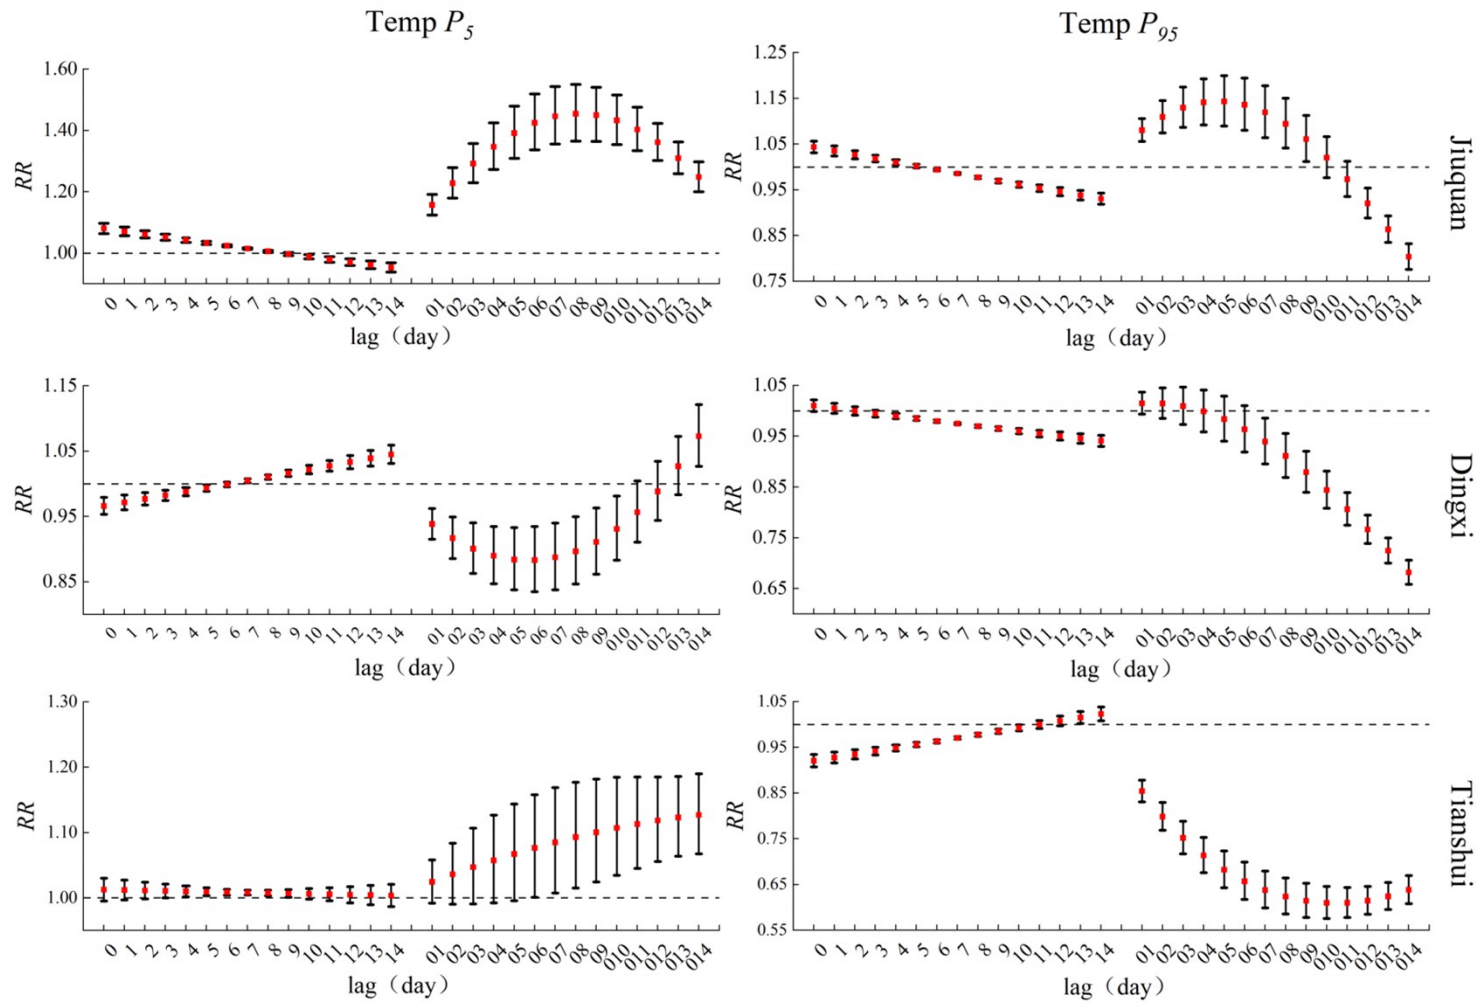

**Figure S2** Impact of extreme low temperature ( $P_5$ ) and extreme high temperature ( $P_{95}$ ) on URTI outpatient volumes in three cities.

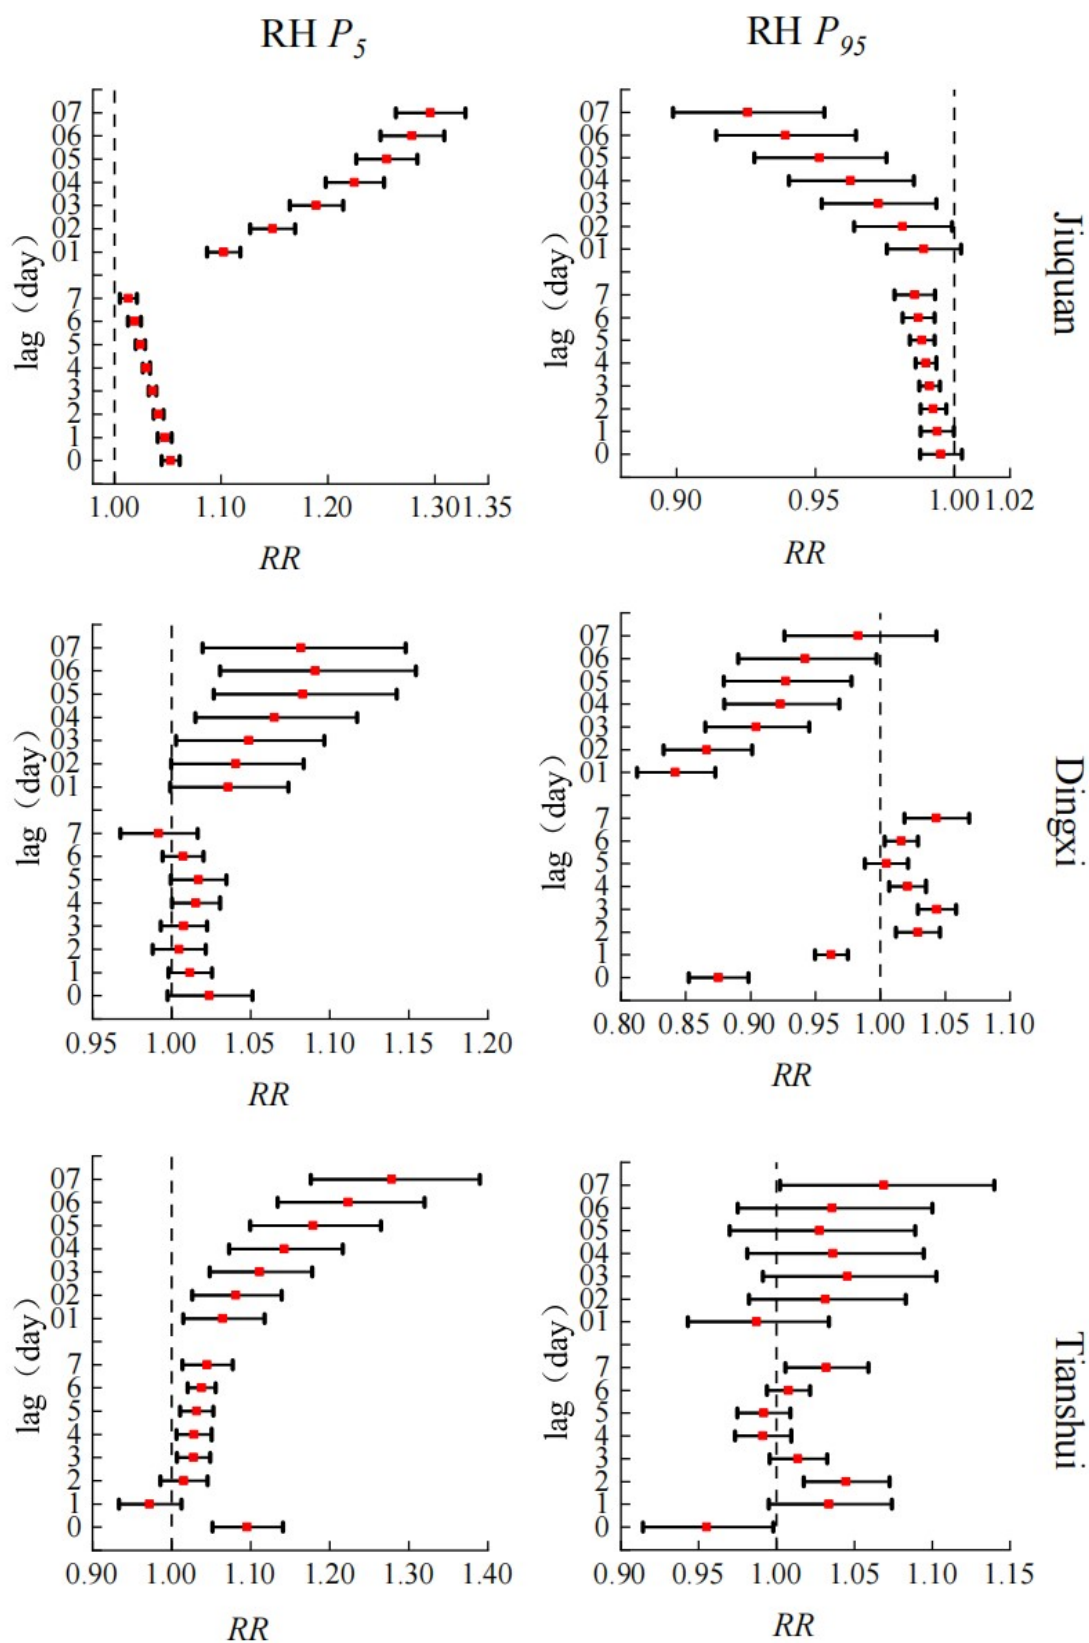

**Figure S3** Impact of extreme low RH ( $P_5$ ) and extreme high RH ( $P_{95}$ ) on URTI outpatient volumes in three cities

**Table S5** Relative risk and 95% CI of outpatient visits for URTI associated with meteorological factors <sup>a</sup> by gender, age and season in three cities analyzed.

|                 | Low temperature    | High temperature   | Low RH             | High RH            |
|-----------------|--------------------|--------------------|--------------------|--------------------|
| <b>Jiuquan</b>  |                    |                    |                    |                    |
| Gender          |                    |                    |                    |                    |
| Male            | 1.276(1.225,1.330) | 1.161(1.030,1.293) | 1.113(1.059,1.170) | 0.974(0.751,1.261) |
| Female          | 1.114(0.970,1.279) | 0.867(0.723,1.018) | 1.049(1.019,1.079) | 0.904(0.859,1.052) |
| Age(years)      |                    |                    |                    |                    |
| 0-14            | 2.042(1.138,3.676) | 1.012(0.957,1.071) | 1.929(1.871,1.988) | 0.810(0.753,0.872) |
| 15-64           | 0.816(0.780,0.955) | 0.612(0.451,0.831) | 1.345(1.226,1.527) | 0.530(0.478,0.587) |
| ≥65             | 1.490(1.417,1.567) | 0.693(0.662,0.726) | 1.928(1.855,2.008) | 0.854(0.655,0.981) |
| Season          |                    |                    |                    |                    |
| Cold            | 1.333(1.251,1.420) | -                  | 1.350(1.278,1.427) | 0.560(0.528,0.593) |
| Warm            | -                  | 0.579(0.539,0.621) | 0.585(0.547,0.625) | 0.797(0.748,0.849) |
| <b>Dingxi</b>   |                    |                    |                    |                    |
| Gender          |                    |                    |                    |                    |
| Male            | 1.268(1.150,1.399) | 0.641(0.591,0.695) | 1.088(1.020,1.162) | 0.966(0.835,1.117) |
| Female          | 1.028(0.978,1.081) | 0.691(0.665,0.719) | 1.044(0.905,1.204) | 0.987(0.924,1.054) |
| Age(years)      |                    |                    |                    |                    |
| 0-14            | 1.821(1.453,2.283) | 0.664(0.637,0.693) | 1.181(1.099,1.268) | 1.084(1.010,1.164) |
| 15-64           | 1.234(1.086,1.386) | 0.687(0.640,0.737) | 0.941(0.838,1.058) | 0.728(0.646,0.819) |
| ≥65             | 1.402(1.286,1.528) | 1.144(0.963,1.358) | 1.067(1.007,1.179) | 1.303(0.975,1.741) |
| Season          |                    |                    |                    |                    |
| Cold            | 1.263(1.181,1.351) | -                  | 1.245(1.157,1.339) | 0.842(0.784,0.904) |
| Warm            | -                  | 0.762(0.718,0.809) | 0.537(0.504,0.573) | 1.952(1.745,2.183) |
| <b>Tianshui</b> |                    |                    |                    |                    |
| Gender          |                    |                    |                    |                    |
| Male            | 1.162(1.048,1.290) | 0.731(0.658,0.811) | 1.710(1.387,2.109) | 1.155(1.094,1.213) |
| Female          | 1.134(1.065,1.207) | 0.616(0.584,0.651) | 1.205(1.100,1.320) | 1.047(0.975,1.124) |
| Age(years)      |                    |                    |                    |                    |
| 0-14            | 1.319(1.237,1.406) | 0.592(0.558,0.629) | 1.888(1.231,2.545) | 1.693(1.479,1.907) |
| 15-64           | 1.156(1.064,1.215) | 0.675(0.615,0.740) | 1.072(0.969,1.186) | 0.852(0.784,0.925) |
| ≥65             | 1.214(1.079,1.366) | 0.413(0.314,0.543) | 1.226(1.038,1.449) | 1.066(1.006,1.121) |
| Season          |                    |                    |                    |                    |
| Cold            | 1.184(1.092,1.284) | -                  | 1.323(1.191,1.471) | 1.275(1.181,1.377) |
| Warm            | -                  | 0.627(0.571,0.689) | 0.929(0.853,0.010) | 1.334(1.234,1.442) |

<sup>a</sup> Concentration of Low temperature at lag08, High temperature at lag05, Low RH at lag07, and High RH at lag04 were analyzed.

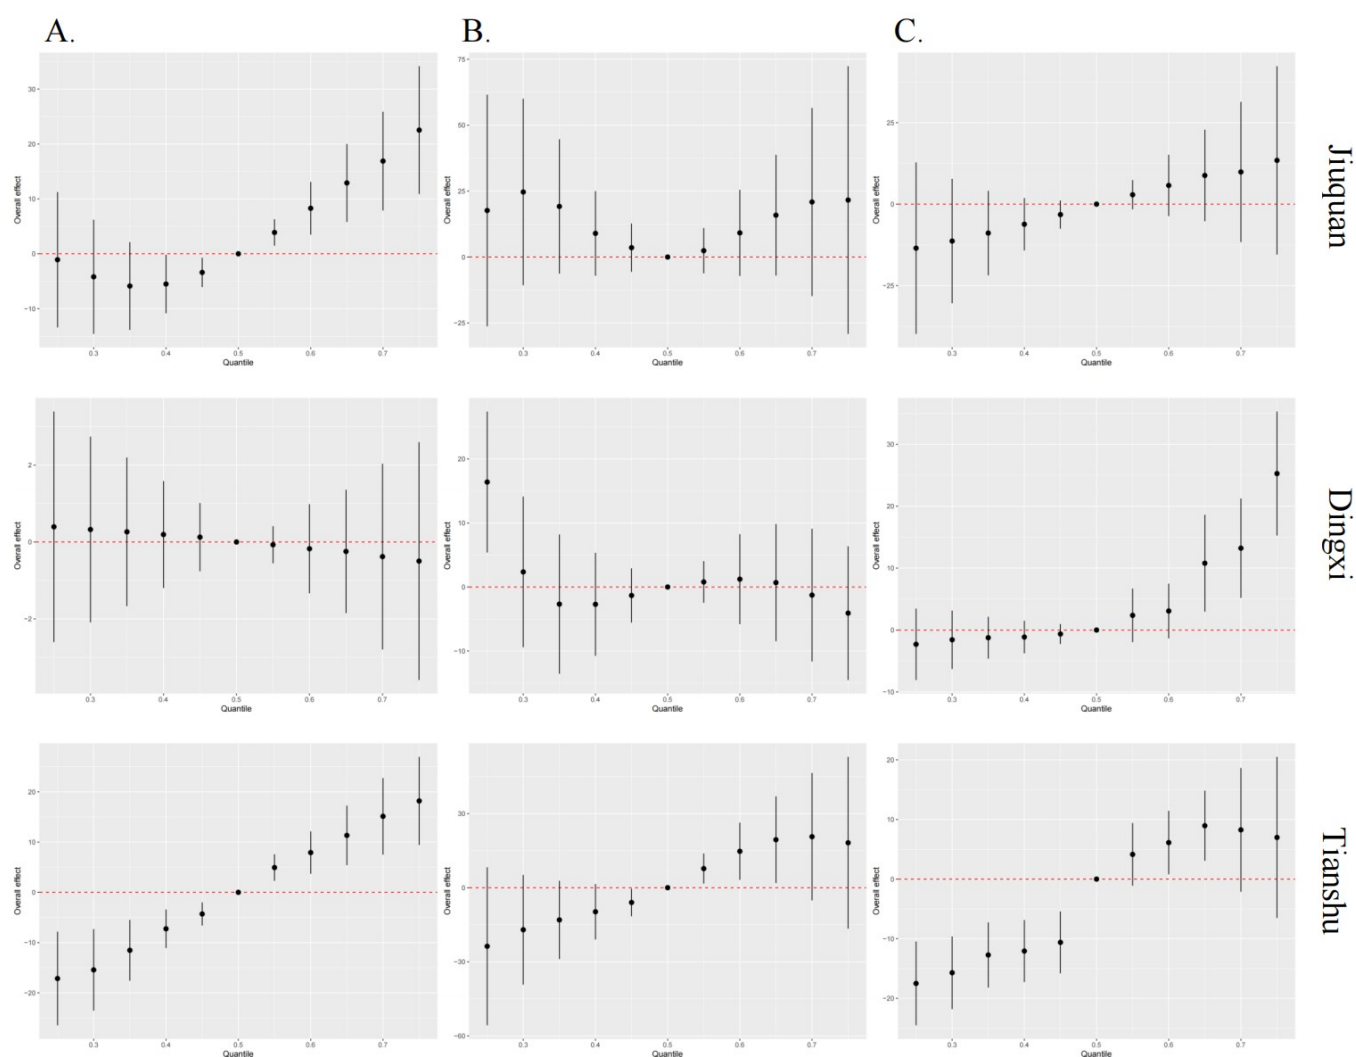

**Figure S4** Mixed effect of air pollutants and meteorological factors (temperature and RH) on URTI outpatient visits according to the BKMR. **A** air pollutants and temperature. **B** air pollutants and RH. **C** air pollutants model

**Table S6** Previous studies on air pollutants and URTI

| Authors (Year)         | Model                          | Study Period | Location        | Admission Type                     | N       | Exposure          | Lag (Days) | RR/OR                |
|------------------------|--------------------------------|--------------|-----------------|------------------------------------|---------|-------------------|------------|----------------------|
| 1. Wang et al.(2023)   | GAM                            | 2019-2021    | Kunshan, China  | Outpatient visits                  | 93,4180 | PM <sub>2.5</sub> | lag05      | 1.065 (1.055, 1.076) |
|                        |                                |              |                 |                                    |         | PM <sub>10</sub>  | lag05      | 1.045 (1.037, 1.052) |
|                        |                                |              |                 |                                    |         | NO <sub>2</sub>   | lag05      | 1.098 (1.085, 1.111) |
| 2. Nguyen et al.(2024) | Time-stratified Case-crossover | 2007-2019    | Hanoi, Vietnam  | Hospital admissions among children | 66,893  | PM <sub>2.5</sub> | lag02      | 1.008 (1.003, 1.013) |
|                        |                                |              |                 |                                    |         | PM <sub>10</sub>  | lag02      | 1.003 (1.000, 1.006) |
|                        |                                |              |                 |                                    |         | NO <sub>2</sub>   | lag02      | 1.011 (1.004, 1.019) |
|                        |                                |              |                 |                                    |         | CO                | lag02      | 1.023 (1.004, 1.043) |
| 3. Yang (2018)         | Time-stratified Case-crossover | 2013-2014    | Shenyang, China | Outpatient visits                  | 1,091   | PM <sub>2.5</sub> | lag4       | 1.002 (1.000, 1.004) |
|                        |                                |              |                 |                                    |         | PM <sub>10</sub>  | lag4       | 1.001 (1.000, 1.003) |
|                        |                                |              |                 |                                    |         | NO <sub>2</sub>   | lag4       | 1.009 (1.004, 1.013) |
|                        |                                |              |                 |                                    |         | CO                | lag2       | 1.199 (1.088, 1.321) |
| 4. Li et al.(2017)     | Time-stratified Case-crossover | 2013-2014    | Beijing, China  | Outpatient visits                  | 36,615  | PM <sub>2.5</sub> | lag5       | 1.001 (1.001, 1.001) |
|                        |                                |              |                 |                                    |         | PM <sub>10</sub>  | lag5       | 1.001 (1.000, 1.001) |
|                        |                                |              |                 |                                    |         | NO <sub>2</sub>   | lag5       | 1.003 (1.002, 1.003) |

|                     |     |           |                    |                   |         |                  |      |                       |
|---------------------|-----|-----------|--------------------|-------------------|---------|------------------|------|-----------------------|
|                     |     |           |                    |                   |         | CO               | lag5 | 1.095 ( 1.071, 1.118) |
| 5. Tam et al.(2014) | GAM | 2008-2010 | Hongkong,<br>China | Outpatient visits | 817,240 | PM <sub>10</sub> | -    | 1.005 (1.002, 1.009)  |
|                     |     |           |                    |                   |         | NO <sub>2</sub>  | -    | 1.010 (1.006, 1.013)  |

Note:

1. H. Wang, G. H. Qian, J. Shi, W. J. Lu, Y. C. Chen, K. Fang, Y. Shen, H. Rong, X. H. Huangfu, Y. Feng, W. Zhang and K. Zhang, Association between short-term exposure to ambient air pollution and upper respiratory tract infection in Kunshan, *Int. J. Biometeorol.*, 2024, **68**(2), 189-197. <https://doi.org/10.1007/s00484-023-02582-5>
2. T. T. N. Nguyen, T. D. Vu, N. L. Vuong, T. V. L. Pham, T. H. Le, M. D. Tran, T. L. Nguyen, N. Künzli and G. Morgan, Effect of ambient air pollution on hospital admission for respiratory diseases in Hanoi children during 2007-2019, *Environ. Res.*, 2024, **241**, 117633. <https://doi.org/10.1016/j.envres.2023.117633>
3. Q. Yang, *Study on the effect of air pollutants on respiratory disease outpatients in Shenyang during the heating period*, University of Science and Technology of China, 2018.
4. R. Li, N. Jiang, Q. C. Liu, J. Huang, X. B. Guo, F. Liu and Z. C. Gao, Impact of air pollutants on outpatient visits for acute respiratory outcomes, *Int. J. Environ. Res. Public Health.*, 2017, **14**(1), 47. <https://doi.org/10.3390/ijerph14010047>
5. W. W. S. Tam, T. W. Wong, L. Ng, S. Y. S. Wong, K. K. L. Kung and A. H. S. Wong, Association between air pollution and general outpatient clinic consultations for upper respiratory tract infections in Hong Kong, *PLoS. One.*, 2014, **9**(1), e86913. <https://doi.org/10.1371/journal.pone.0086913>

| Authors (Year)       | Study Period | Location          | Admission Type                                        | Conclusion                                                                                                                                                                                                                                                                                                                                                                                                                                                                                                                                                                                                     |
|----------------------|--------------|-------------------|-------------------------------------------------------|----------------------------------------------------------------------------------------------------------------------------------------------------------------------------------------------------------------------------------------------------------------------------------------------------------------------------------------------------------------------------------------------------------------------------------------------------------------------------------------------------------------------------------------------------------------------------------------------------------------|
| 1. Hong et al.(2020) | 2015-2016    | Shenyang, China   | Respiratory diseases outpatient visits                | PM <sub>2.5</sub> , PM <sub>10</sub> , and NO <sub>2</sub> were most significantly affected by the presence of an interaction between low temperature and high concentration conditions                                                                                                                                                                                                                                                                                                                                                                                                                        |
| 2. Ji (2021)         | 2016-2019    | Fuzhou, China     | Respiratory diseases deaths                           | At lower temperatures, the number of deaths from respiratory diseases among residents increases as the concentration of particulate matter rises. There were remarkable interaction effects between air pollutants and temperature on outpatient visits for respiratory diseases, while the extent of the effects varied among the pollutants. PM <sub>2.5</sub> and PM <sub>10</sub> had more significant impacts on respiratory disease outpatient visits in high temperature-high concentration scenarios, while NO <sub>2</sub> and CO were more harmful in low temperature-high concentration conditions. |
| 3. Gao (2023)        | 2019-2021    | Hohhot, China     | Respiratory diseases outpatient visits                | The interaction effects between temperature and different pollutants on respiratory diseases in children were inconsistent across the cities.                                                                                                                                                                                                                                                                                                                                                                                                                                                                  |
| 4. Li (2021)         | 2013-2018    | 5 cities in China | Respiratory diseases outpatient visits among children |                                                                                                                                                                                                                                                                                                                                                                                                                                                                                                                                                                                                                |

**Table S7** Previous studies on interaction effects between air pollutants and temperature on respiratory diseases

Note:

1. Y. Hong, Y. Zhang, Y. J. Ma, S. G. Wang, J. Zhang, L. Hou, K. Q. Chen and H. Li, Effects of air pollutants and meteorological factors on outpatient visitors for respiratory diseases in Shenyang, China. *Environ. Sci.*, 2020, **40**(9), 4077-4090.
2. S. M. Ji, *Assessment of the risk of death of residents by particulate matter, air temperature, and their interaction in Fuzhou*, Fujian Medical University, 2021.
3. C. H. Gao, *The influence of the interaction between air pollutants and temperature on outpatient volume of respiratory diseases in a hospital in Hohhot*, Inner Mongolia Medical University, 2023.
4. M. Li, *Short-term exposure to ambient air pollutants and respiratory outpatient visits among children: a multi-city time-series study*, Huazhong University of Science and Technology, 2021.

| Authors (Year)  | Study Period | Location          | Admission Type                                        | Conclusion                                                                                                                                                                                                                                           |
|-----------------|--------------|-------------------|-------------------------------------------------------|------------------------------------------------------------------------------------------------------------------------------------------------------------------------------------------------------------------------------------------------------|
| 1. Li (2021)    | 2013-2018    | 5 cities in China | Respiratory diseases outpatient visits among children | The interactions of PM <sub>2.5</sub> , PM <sub>10</sub> , and NO <sub>2</sub> with humidity were stronger under high humidity conditions in Wuhan, while the interaction of PM <sub>2.5</sub> was stronger in Xining under low humidity conditions. |
| 2. Zhong (2021) | 2013-2015    | Guangzhou, China  | Emergency visits for respiratory diseases             | The effect of PM <sub>2.5</sub> , PM <sub>10</sub> , and NO <sub>2</sub> on the number of residential respiratory emergencies was more pronounced under low humidity conditions                                                                      |

**Table S8** Previous studies on interaction effects between air pollutants and RH on respiratory diseases

Note:

1. M. Li, *Short-term exposure to ambient air pollutants and respiratory outpatient visits among children: a multi-city time-series study*, Huazhong University of Science and Technology, 2021.
2. Y. P. Zhong, *Study on correlation of air pollution and meteorological factors and emergency room visits for respiratory diseases in Guangzhou*, China Medical University, 2021.
